# Supplementary material for: Quantifying hydroxyl radicals generated by a low-temperature plasma using coumarin: methodology and precautions
Source: Royal Society of Chemistry journal article supplement (doi:10.1039/d4cp00040d), 2024-01-01
Supplement: d4cp00040d1.pdf [file d4cp00040d1.pdf]

## Quantifying Hydroxyl Radicals Generated by a Low-Temperature Plasma using Coumarin: Methodology and Precautions

Florent Ducrozet,<sup>a</sup> Amal Sebastian,<sup>a,b</sup> Cecilia Garcia Villavicencio,<sup>a,b</sup> Sylwia Ptasinska<sup>a,b</sup> and Cécile Sicard-Roselli<sup>c</sup>

### Supporting Information

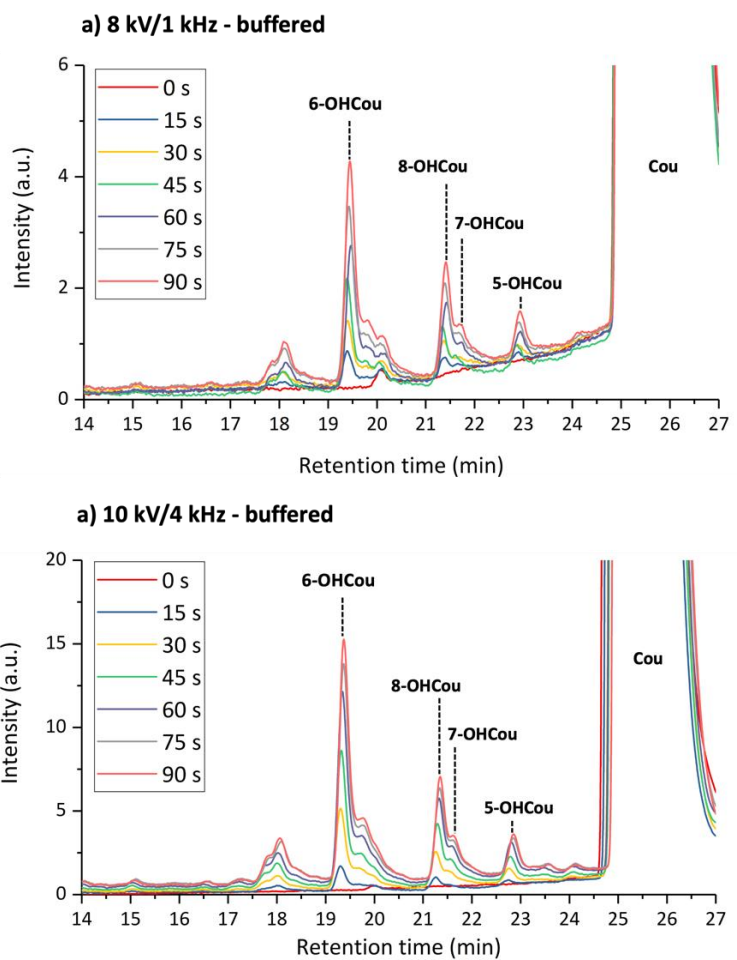

**Figure S1:** HPLC profiles of buffered solutions irradiated by plasma at a) 8 kV/4 kHz and b) 10 kV/4 kHz. Detection by absorption at 280 nm.
